# Supplementary material for: Global premature mortality by dust and pollution PM2.5 estimated from aerosol reanalysis of the modern-era retrospective analysis for research and applications, version 2
Source: Frontiers journal article supplement (doi:10.3389/fenvs.2022.975755), 2022-09-15
Supplement: Data_Sheet_1.docx [file Data_Sheet_1.docx]

Supplementary Material

| **Table S1: Annual average PM2.5 concentration (μg m-3) measured at the US Diplomatic Posts in 2019 and 2020.** | | | | |
| --- | --- | --- | --- | --- |
| **Site name** | **Lat** | **Lon** | **2019** | **2020** |
| AbuDhabi | 24.5 | 54.4 | 44.6 | 25.4 |
| Accre | 5.6 | -0.2 | - | 28.6 |
| AddisAbaba | 9.0 | 38.8 | 20.3 | 24.3 |
| Algiers | 36.8 | 3.1 | 21.8 | 20.3 |
| Almaty | 43.2 | 76.9 | - | 29 |
| Amman | 32.0 | 35.9 | - | 20.7 |
| Antananarivo | -18.9 | 47.5 | - | 18.6 |
| Ashgabat | 38.0 | 58.3 | - | 16.8 |
| Baghdad | 33.3 | 44.3 | 38.3 | - |
| Bamako | 12.6 | -8.0 | - | 61.2 |
| Beijing | 39.9 | 116.4 | 42.7 | 39 |
| Bishkek | 42.9 | 74.6 | 35.4 | 31.6 |
| Bogota | 4.7 | -74.1 | 13.0 | 12.8 |
| Chennai | 13.1 | 80.3 | 27.9 | 25.8 |
| Colombo | 6.9 | 79.9 | 23.5 | 19.5 |
| Conakry | 9.6 | -13.6 | - | 27 |
| Curacao | 12.2 | -69.0 | - | 10.4 |
| Dhahran | 26.2 | 50.0 | 39.7 | 38.4 |
| Dhaka | 23.8 | 90.4 | 86.3 | 84.4 |
| Dubai | 25.2 | 55.3 | 45.7 | 33.8 |
| Dushanbe | 38.6 | 68.8 | - | 53.5 |
| Kathmandu | 27.7 | 85.3 | 45.7 | 36.6 |
| Guangzhou | 23.1 | 113.3 | 29.2 | 22.8 |
| GuatemalaCity | 14.6 | -90.5 | - | 19.3 |
| Hanoi | 21.0 | 105.8 | - | 43.7 |
| HoChiMinhCity | 10.8 | 106.2 | 25.9 | 23.1 |
| Hyderabad | 17.4 | 78.5 | 43.0 | 37.6 |
| Islamabad | 33.7 | 73.0 | - | 46.1 |
| JakartaCentral | -6.2 | 106.8 | 40.1 | 34 |
| JakartaSouth | -6.2 | 106.8 | 52.6 | 41.5 |
| Jeddah | 21.5 | 39.2 | - | 31.6 |
| Kampala | 0.3 | 32.6 | 60.5 | 57.7 |
| Karachi | 24.9 | 67.0 | - | 48.9 |
| Kathmandu | 27.7 | 85.3 | 54.5 | 43.1 |
| Khartoum | 15.5 | 32.6 | - | 46.6 |
| Kolkata | 22.6 | 88.4 | 69.3 | 69.7 |
| KuwaitCity | 29.4 | 48.0 | 47.2 | 44.9 |
| Lahore | 31.5 | 74.4 | - | 104.2 |
| Lima | -12.0 | -77.0 | 30.5 | 23.4 |
| Manama | 26.2 | 50.6 | 47.6 | 43.4 |
| Mumbai | 19.1 | 72.9 | 43.9 | 45 |
| NewDelhi | 28.6 | 77.2 | 104.6 | 89.3 |
| Nur-Sultan | 51.2 | 71.5 | 24.1 | 19.4 |
| Peshawar | 34.0 | 71.5 | - | 72.2 |
| Pristina | 42.7 | 21.2 | 25.9 | 28.4 |
| Rangoon | 16.8 | 96.2 | - | 28.5 |
| SanJose | 9.9 | -84.1 | - | 9.3 |
| Sarajevo | 43.9 | 18.4 | 37.0 | 43.8 |
| Shanghai | 31.2 | 121.5 | 37.1 | 29.6 |
| Shenyang | 41.8 | 123.4 | 47.2 | 45.2 |
| Tashkent | 41.3 | 69.2 | 41.9 | 38.1 |
| Ulaanbaatar | 47.9 | 106.9 | 61.2 | 52 |
| Vientiane | 18.0 | 102.6 | - | 32.4 |

|  |
| --- |
| **Figure S1:** Relative risk (RR) as a function of PM2.5 concentration (g m-3) for individual causes of mortality (a) ALRI (b) CEV, (c) COPD, (d) IHD, and (e) LC. The thick line represents the average and shaded area for the upper and lower bounds (to be used for estimating CI95 range of the mortality in this study). |

**Figure S2:** The 2019 baseline mortality counts for individual causes (a – ALRI, b – CEV, c – COPD, d – IHD, and e – LC) and all-cause total (f).

| 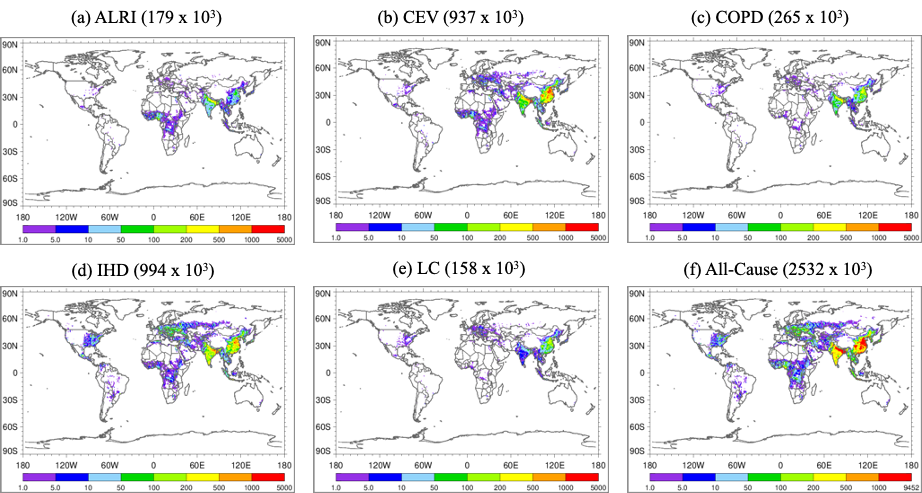 |
| --- |
| **Figure S3:** Cause-specific (a: ALRI, b: CEV, c: COPD, d: IHD, and e: LC) and all-cause (f) mortality attributable to pollution PM2.5 in 2019. |

| 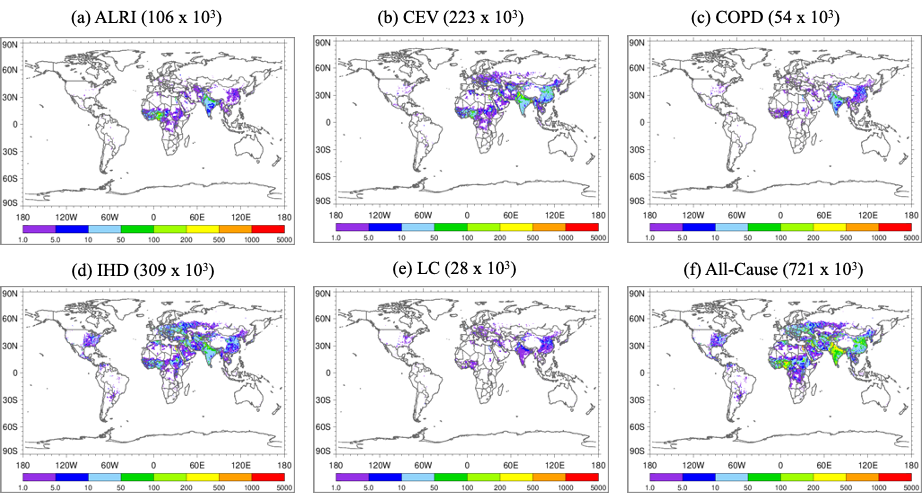 |
| --- |
| **Figure S4:** Cause-specific (a: ALRI, b: CEV, c: COPD, d: IHD, and e: LC) and all-cause (f) mortality attributable to dust PM2.5 in 2019. |
